# Supplementary material
Source: publisher site journal article supplement (https://www.dovepress.com/article/580654)
Supplement: Supplementary file 1 [file 580654-%20Supplement%201.docx]

Supplement 1 Univariate Logistic Regression Analysis of Possible Predictive Factors for Postoperative Memory Decline

| Variable | Postoperative  Memory Decline  (n=99) | No-Postoperative Memory Decline  (n=122) | Univariate Odds  Ratio (95%CI) | *p* |
| --- | --- | --- | --- | --- |
| Ages(y) | 54(36-59) | 44.5(19-59) | 18.81(7.15-49.45) | <0.001 |
| BMI(kg/m2) | 22.8(21.5-23.7) | 23.1(20.8-23.8) | 0.81(0.71-1.35) | 0.123 |
| Weight(kg) | 61(57-66) | 62(55-70) | 0.98(0.95-1.02) | 0.309 |
| Male (%) | 52(52.5) | 59(48.4) | 1.18(0.70-2.01) | 0.538 |
| ASA III (%) | 79(79.8) | 49(40.2) | 5.89(3.20-10.83) | <0.001 |
| Education (%) |  |  |  | <0.001 |
| Illiteracy | 11(11.1) | 1(0.08) | Ref. |  |
| Elementary school | 48(48.5) | 16(13.1) | 0.27(0.03-2.28) | 0.231 |
| Middle school | 28(28) | 33(27) | 0.08(0.01-0.64) | 0.017 |
| High school | 8(8.1) | 15(12.3) | 0.05(0.01-0.45) | 0.008 |
| University/above | 4(4.0) | 57(46.7) | 0.01(0.001-0.06) | <0.001 |
| Pre-MES scores | 86(85-89) | 90(87-93) | 0.78(0.72-0.86) | <0.001 |
| Pre-MoCA scores | 25(24-26) | 26(25-27) | 0.53(0.42-0.67) | <0.001 |
| Complications (%) |  |  |  |  |
| Hypertension | 37(37.4) | 18(14.8) | 3.45(1.80-6.57) | <0.001 |
| Diabetes mellitus | 15(15.2) | 2(1.6) | 10.71(2.39-48.09) | 0.002 |
| Cerebral infarction | 5(5.1) | 4(3.3) | 1.57(0.41-6.01) | 0.511 |
| Arrhythmia | 3(3.0) | 3(2.5) | 1.24(0.25-6.28) | 0.795 |
| Group |  |  |  |  |
| Group R | 40(40.4) | 70(57.4) | Ref. |  |
| Group P | 59(59.6) | 52(42.6) | 1.99(1.16-3.40) | 0.013 |
| Anesthesia time(min) | 191(155-220) | 140(130-163.5) | 1.03(1.02-1.04) | <0.001 |
| Pneumoperitoneum time(min) | 160(123-182) | 112.5(102-129) | 1.03(1.02-1.04) | <0.001 |
| PACU time(min) | 70(54-93) | 65(48-88.25) | 1.01(0.99-1.02) | 0.064 |
| Recovery time(min) | 39(28-53) | 35(26-47) | 1.01(1.00-1.03) | 0.048 |
| Duration of hospitalization(d) | 12(9-16) | 8.5(7-11) | 1.20(1.12-1.29) | <0.001 |
